# Supplementary material
Source: PubMed Central journal article supplement (PMC9006559)
Supplement: 13063_2022_6224_MOESM1_ESM.pdf [file 13063_2022_6224_MOESM1_ESM.pdf]

**Important information. Please read.**

- This form should be used by authors to request any change in authorship (adding/deleting authors) including changes in corresponding authors. This form should not be used for name changes. Please fully complete all sections. Use black ink and block capitals and provide each author's full name with the given name first followed by the family name.
- By signing this declaration, all authors guarantee that the order of the authors are in accordance with their scientific contribution, if applicable as different conventions apply per discipline, and that only authors have been added who made a meaningful contribution to the work.
- Please note, in author collaborations where there is formal agreement for representing the collaboration, it is sufficient for the representative or legal guarantor (usually the corresponding author) to complete and sign the Authorship Change Form on behalf of all authors, **next to the added/removed author(s). (Complete Section 3, followed by Section 6.)**  
 In author collaborations where there is no formal agreement for representing the collaboration and **there are more than 10 authors**, one may sign for all, provided the signer appends correspondence that attests that each of the authors have agreed to the change **and the added/removed authors sign the form. (Complete Section 3, followed by Section 6.)**
- Please note, we cannot investigate or mediate any authorship disputes. If you are unable to obtain agreement from all authors (including those who you wish to be removed) you must refer the matter to your institution(s) for investigation. Please inform us if you need to do this.
- If you are not able to return a fully completed form within **30 days** of the date that it was sent to the author requesting the change, we may have to withdraw your manuscript. We cannot publish manuscripts where authorship has not been agreed by all authors (including those who have been removed).
- Incomplete forms will be rejected.
- Please return/upload this form, fully completed, to the Journals Editorial Office. The Journal and/or Publisher will consider the information you have provided to decide whether to approve the proposed change in authorship. We may decide to contact your institution for more information or undertake a further investigation, if appropriate, before making a final decision.

Section 1: Please provide the current title of manuscript

Manuscript ID no.: **TRLS-D-22-00047**

Title: **Effect of novel training to normalize altered finger force direction post stroke: study protocol for a double-blind randomized controlled trial**

Section 2: Please provide the previous authorship, in the order shown on the manuscript before the changes were introduced. Please indicate the corresponding author by adding (CA) behind the name.

|                         | First name(s)      | Family name         | ORCID or SCOPUS id, if available |
|-------------------------|--------------------|---------------------|----------------------------------|
| 1 <sup>st</sup> author  | <b>Na Jin</b>      | <b>Seo</b>          | <b>0000-0001-6446-5905</b>       |
| 2 <sup>nd</sup> author  | <b>Derek</b>       | <b>Kamper</b>       | <b>0000-0001-9048-4106</b>       |
| 3 <sup>rd</sup> author  | <b>Viswanathan</b> | <b>Ramakrishnan</b> | <b>0000-0002-4098-0539</b>       |
| 4 <sup>th</sup> author  | <b>Jillian</b>     | <b>Harvey</b>       | <b>0000-0002-6814-8226</b>       |
| 5 <sup>th</sup> author  | <b>Christian</b>   | <b>Finetto</b>      | <b>0000-0003-0520-2034</b>       |
| 6 <sup>th</sup> author  | <b>Christian</b>   | <b>Schranz</b>      | <b>0000-0003-1102-7180</b>       |
| 7 <sup>th</sup> author  | <b>Gabrielle</b>   | <b>Scronce</b>      | <b>0000-0002-3861-1371</b>       |
| 8 <sup>th</sup> author  | <b>Kristen</b>     | <b>Coupland</b>     |                                  |
| 9 <sup>th</sup> author  | <b>Keith</b>       | <b>Howard</b>       |                                  |
| 10 <sup>th</sup> author | <b>Jenna</b>       | <b>Blaschke</b>     |                                  |

Please use an additional sheet if there are more than 10 authors.

|             |                |                |
|-------------|----------------|----------------|
| 11th author | <b>Adam</b>    | <b>Baker</b>   |
| 12th author | <b>Caitlyn</b> | <b>Meinzer</b> |
| 13th author | <b>Robert</b>  | <b>Adams</b>   |

Section 3: Please provide a justification for change. Please use this section to explain your reasons for changing the authorship of your manuscript, e.g. what necessitated the change in authorship? Please refer to the (journal) policy pages for more information about authorship. Please explain why omitted authors were not originally included and/or why authors were removed on the submitted manuscript.

**Dr. Craig Velozo is a member of the Data and Safety Monitoring Board for the trial and has substantially contributed to the trial design and monitoring. He did not have time to review the manuscript at the time of submission. Since then, he has reviewed the manuscript, provided substantial comments, approved the manuscript, and agreed to be accountable as an author and ensure integrity of the work.**

Section 4: Proposed new authorship. Please provide your new authorship list in the order you would like it to appear on the manuscript. Please indicate the corresponding author by adding (CA) behind the name. If the Corresponding Author has changed, please indicate the reason under section 3.

|                         | First name(s)      | Family name (this name will appear in full on the final publication and will be searchable in various abstract and indexing databases) | Affiliated institute                        | E-mail address           |
|-------------------------|--------------------|----------------------------------------------------------------------------------------------------------------------------------------|---------------------------------------------|--------------------------|
| 1 <sup>st</sup> author  | <b>Na Jin</b>      | <b>Seo (CA)</b>                                                                                                                        | <b>Medical University of South Carolina</b> | <b>seon@musc.edu</b>     |
| 2 <sup>nd</sup> author  | <b>Derek</b>       | <b>Kamper</b>                                                                                                                          | <b>North Carolina State University</b>      | <b>dgkamper@ncsu.edu</b> |
| 3 <sup>rd</sup> author  | <b>Viswanathan</b> | <b>Ramakrishnan</b>                                                                                                                    | <b>Medical University of South Carolina</b> | <b>ramakris@musc.edu</b> |
| 4 <sup>th</sup> author  | <b>Jillian</b>     | <b>Harvey</b>                                                                                                                          | <b>Medical University of South Carolina</b> | <b>harveyji@musc.edu</b> |
| 5 <sup>th</sup> author  | <b>Christian</b>   | <b>Finetto</b>                                                                                                                         | <b>Medical University of South Carolina</b> | <b>finetto@musc.edu</b>  |
| 6 <sup>th</sup> author  | <b>Christian</b>   | <b>Schranz</b>                                                                                                                         | <b>Medical University of South Carolina</b> | <b>schranz@musc.edu</b>  |
| 7 <sup>th</sup> author  | <b>Gabrielle</b>   | <b>Scronce</b>                                                                                                                         | <b>Medical University of South Carolina</b> | <b>scronce@musc.edu</b>  |
| 8 <sup>th</sup> author  | <b>Kristen</b>     | <b>Coupland</b>                                                                                                                        | <b>Medical University of South Carolina</b> | <b>coupland@musc.edu</b> |
| 9 <sup>th</sup> author  | <b>Keith</b>       | <b>Howard</b>                                                                                                                          | <b>Medical University of South Carolina</b> | <b>howardke@musc.edu</b> |
| 10 <sup>th</sup> author | <b>Jenna</b>       | <b>Blaschke</b>                                                                                                                        | <b>Medical University of South Carolina</b> | <b>blaschkj@musc.edu</b> |
| 11th author             | <b>Adam</b>        | <b>Baker</b>                                                                                                                           | <b>Medical University of South Carolina</b> | <b>bakerdon@musc.edu</b> |
| 12th author             | <b>Caitlyn</b>     | <b>Meinzer</b>                                                                                                                         | <b>Medical University of South Carolina</b> | <b>ellerbcn@musc.edu</b> |
| 13th author             | <b>Craig</b>       | <b>Velozo</b>                                                                                                                          | <b>Medical University of South Carolina</b> | <b>velozo@musc.edu</b>   |
| 14th author             | <b>Robert</b>      | <b>Adams</b>                                                                                                                           | <b>Medical University of South Carolina</b> | <b>adamsrj@musc.edu</b>  |

Section 5: Author contribution, Acknowledgement and Disclosures. Please use this section to provide a new disclosure statement and, if appropriate, acknowledge any contributors who have been removed as authors and ensure you state what contribution any new authors made (if applicable per the journal or book (series) policy). **Please ensure these are updated in your manuscript - after approval of the change(s) - as our production department will not transfer the information in this form to your manuscript.**

**New acknowledgements:**

**Dr. Velozo will be removed from the acknowledgment as he is now an author.**

**New Disclosures (financial and non-financial interests, funding):**

N/A

**New Author Contributions statement (if applicable per the journal policy):**

**CM, CV, and RA serve in the Data and Safety Monitoring Board.  
CV is the added author, Dr. Velozo.**

State 'Not applicable' if there are no new authors.

**Section 6: Declaration of agreement. All authors, unchanged, new and removed *must* sign this declaration.**

(NB: Please print the form, (docu)-sign and return/upload a scanned copy. Please note that signatures that have been inserted as an image file are acceptable as long as it is handwritten. Typed names in the signature box are unacceptable.) \* Please delete as appropriate. Delete all of the bold if you were on the original authorship list and are remaining as an author.

|                         | First name         | Family name         |                                                                                                                                                                                   | Signature                                                                             | Date      |
|-------------------------|--------------------|---------------------|-----------------------------------------------------------------------------------------------------------------------------------------------------------------------------------|---------------------------------------------------------------------------------------|-----------|
| 1 <sup>st</sup> author  | <b>Na Jin</b>      | <b>Seo</b>          | I agree to the proposed new authorship shown in section 4 <del>/and the addition/removal*of my name to the authorship list/</del> and the proposed change in corresponding author |    | 2/11/2022 |
| 2 <sup>nd</sup> author  | <b>Derek</b>       | <b>Kamper</b>       | I agree to the proposed new authorship shown in section 4 <del>/and the addition/removal*of my name to the authorship list/</del> and the proposed change in corresponding author |                                                                                       |           |
| 3 <sup>rd</sup> author  | <b>Viswanathan</b> | <b>Ramakrishnan</b> | I agree to the proposed new authorship shown in section 4 <del>/and the addition/removal*of my name to the authorship list/</del> and the proposed change in corresponding author |    | 2/16/22   |
| 4 <sup>th</sup> authors | <b>Jillian</b>     | <b>Harvey</b>       | I agree to the proposed new authorship shown in section 4 <del>/and the addition/removal*of my name to the authorship list/</del> and the proposed change in corresponding author |                                                                                       |           |
| 5 <sup>th</sup> author  | <b>Christian</b>   | <b>Finetto</b>      | I agree to the proposed new authorship shown in section 4 <del>/and the addition/removal*of my name to the authorship list/</del> and the proposed change in corresponding author |                                                                                       |           |
| 6 <sup>th</sup> author  | <b>Christian</b>   | <b>Schranz</b>      | I agree to the proposed new authorship shown in section 4 <del>/and the addition/removal*of my name to the authorship list/</del> and the proposed change in corresponding author |  | 2/16/22   |
| 7 <sup>th</sup> author  | <b>Gabrielle</b>   | <b>Scronce</b>      | I agree to the proposed new authorship shown in section 4 <del>/and the addition/removal*of my name to the authorship list/</del> and the proposed change in corresponding author |  | 2/16/22   |

|                         | First name     | Family name     |                                                                                                                                                                                   | Signature                                                                           | Date      |
|-------------------------|----------------|-----------------|-----------------------------------------------------------------------------------------------------------------------------------------------------------------------------------|-------------------------------------------------------------------------------------|-----------|
| 8 <sup>th</sup> author  | <b>Kristen</b> | <b>Coupland</b> | I agree to the proposed new authorship shown in section 4 <del>/and the addition/removal*of my name to the authorship list/</del> and the proposed change in corresponding author |  | 2/16/2022 |
| 9 <sup>th</sup> author  | <b>Keith</b>   | <b>Howard</b>   | I agree to the proposed new authorship shown in section 4 <del>/and the addition/removal*of my name to the authorship list/</del> and the proposed change in corresponding author |  | 2/16/2022 |
| 10 <sup>th</sup> author | <b>Jenna</b>   | <b>Blaschke</b> | I agree to the proposed new authorship shown in section 4 <del>/and the addition/removal*of my name to the authorship list/</del> and the proposed change in corresponding author | .                                                                                   |           |

Please use an additional sheet if there are more than 10 authors.

**In case of author collaborations with formal agreement:**

|                                | Name of consortium/consortia | First name | Family name |                                                                                                                                                                                   | Signature | Date |
|--------------------------------|------------------------------|------------|-------------|-----------------------------------------------------------------------------------------------------------------------------------------------------------------------------------|-----------|------|
| Representative/legal guarantor |                              |            |             | I agree to the proposed new authorship shown in section 4 <del>/and the addition/removal*of my name to the authorship list/</del> and the proposed change in corresponding author |           |      |

**Both added/removed authors should complete the information in the first table under Section 6.**

**Please see the next page for more authors.**

**---- End of form ----**

**Section 6: Declaration of agreement. All authors, unchanged, new and removed *must* sign this declaration.**

(NB: Please print the form, (docu)-sign and return/upload a scanned copy. Please note that signatures that have been inserted as an image file are acceptable as long as it is handwritten. Typed names in the signature box are unacceptable.) \* Please delete as appropriate. Delete all of the bold if you were on the original authorship list and are remaining as an author.

|                                                  | First name     | Family name    |                                                                                                                                                                                   | Signature                                                                           | Date       |
|--------------------------------------------------|----------------|----------------|-----------------------------------------------------------------------------------------------------------------------------------------------------------------------------------|-------------------------------------------------------------------------------------|------------|
| <del>1<sup>st</sup> author</del><br>11th author  | <b>Adam</b>    | <b>Baker</b>   | I agree to the proposed new authorship shown in section 4 <del>/and the addition/removal*of my name to the authorship list/</del> and the proposed change in corresponding author |  | 2/16/22    |
| <del>2<sup>nd</sup> author</del><br>12th author  | <b>Caitlyn</b> | <b>Meinzer</b> | I agree to the proposed new authorship shown in section 4 <del>/and the addition/removal*of my name to the authorship list/</del> and the proposed change in corresponding author |                                                                                     |            |
| <del>3<sup>rd</sup> author</del><br>13th author  | <b>Craig</b>   | <b>Veloze</b>  | I agree to the proposed new authorship shown in section 4 <del>/and the addition/removal*of my name to the authorship list/</del> and the proposed change in corresponding author |  | 02/11/2022 |
| <del>4<sup>th</sup> authors</del><br>14th author | <b>Robert</b>  | <b>Adams</b>   | I agree to the proposed new authorship shown in section 4 <del>/and the addition/removal*of my name to the authorship list/</del> and the proposed change in corresponding author |                                                                                     |            |
| 5 <sup>th</sup> author                           |                |                | I agree to the proposed new authorship shown in section 4 <del>/and the addition/removal*of my name to the authorship list/</del> and the proposed change in corresponding author |                                                                                     |            |
| 6 <sup>th</sup> author                           |                |                | I agree to the proposed new authorship shown in section 4 <del>/and the addition/removal*of my name to the authorship list/</del> and the proposed change in corresponding author |                                                                                     |            |
| 7 <sup>th</sup> author                           |                |                | I agree to the proposed new authorship shown in section 4 <del>/and the addition/removal*of my name to the authorship list/</del> and the proposed change in corresponding author |                                                                                     |            |

**Subject:** Re: Your approval needed

**Date:** Wednesday, February 16, 2022 at 2:16:27 PM Eastern Standard Time

**From:** Derek Kamper

**To:** Seo, Na Jin

**CAUTION: External**

I approve.

Derek

On Wed, Feb 16, 2022 at 1:32 PM Seo, Na Jin <[seon@musc.edu](mailto:seon@musc.edu)> wrote:

Hi Derek,

This email is regarding the VA trial protocol manuscript that was submitted to the journal, Trials.

Dr. Craig Velozo is a member of the Data and Safety Monitoring Board and has substantially contributed to the trial design and monitoring. He was not included as an author in the original submission because he did not have time to review/approve the manuscript at the time of submission. Since then, he has reviewed the manuscript, provided substantial feedback, approved the manuscript, and agreed to be an author.

Could you please **indicate if you approve** adding Dr. Velozo to the author list for the paper?

Thank you!

Na Jin

--

Derek Kamper, Ph.D.  
Associate Professor, Joint Department of Biomedical Engineering  
Associate Director, Closed Loop Engineering for Advanced Rehabilitation (CLEAR)  
North Carolina State University  
University of North Carolina at Chapel Hill  
(919) 515-4411



**Subject:** Re: Your approval needed

**Date:** Wednesday, February 16, 2022 at 5:56:51 PM Eastern Standard Time

**From:** Harvey, Jillian

**To:** Seo, Na Jin

Yes. I approve. Thanks!

Get [Outlook for iOS](#)

---

**From:** Seo, Na Jin <seon@musc.edu>

**Sent:** Wednesday, February 16, 2022 12:34:39 PM

**To:** Harvey, Jillian <harveyji@musc.edu>

**Subject:** Your approval needed

Hi Jillian,

This email is regarding the VA trial protocol manuscript that was submitted to the journal, Trials.

Dr. Craig Velozo is a member of the Data and Safety Monitoring Board and has substantially contributed to the trial design and monitoring. He was not included as an author in the original submission because he did not have time to review/approve the manuscript at the time of submission. Since then, he has reviewed the manuscript, provided substantial feedback, approved the manuscript, and agreed to be an author.

Could you please **indicate if you approve** adding Dr. Velozo to the author list for the paper?

Thank you!

Na Jin

**Subject:** Re: Your signature needed

**Date:** Wednesday, February 16, 2022 at 3:43:59 PM Eastern Standard Time

**From:** Finetto, Christian

**To:** Seo, Na Jin

Hi Na Jin,

I certainly approve. Thanks,

Christian

---

**From:** Seo, Na Jin <seon@musc.edu>

**Sent:** Wednesday, February 16, 2022 2:25 PM

**To:** Finetto, Christian <finetto@musc.edu>; Schranz, Christian <schranz@musc.edu>; Scronce, Gabrielle <scronce@musc.edu>; Howard, Keith <howardke@musc.edu>; Blaschke, Jenna <blaschkj@musc.edu>

**Subject:** Re: Your signature needed

This email is regarding the VA trial protocol manuscript that was submitted to the journal, Trials.

Dr. Craig Velozo is a member of the Data and Safety Monitoring Board and has substantially contributed to the trial design and monitoring. He was not included as an author in the original submission because he did not have time to review/approve the manuscript at the time of submission. Since then, he has reviewed the manuscript, provided substantial feedback, approved the manuscript, and agreed to be an author.

Could you please reply to me and **indicate if you approve** adding Dr. Velozo to the author list for the paper?

You can do that in lieu of signing on the Author Form.

Thank you!

Na Jin

**Subject:** RE: Your signature needed

**Date:** Wednesday, February 16, 2022 at 2:31:01 PM Eastern Standard Time

**From:** Scronce, Gabrielle

**To:** Seo, Na Jin

I approve.

---

**From:** Seo, Na Jin <seon@musc.edu>

**Sent:** Wednesday, February 16, 2022 2:25 PM

**To:** Finetto, Christian <finetto@musc.edu>; Schranz, Christian <schranz@musc.edu>; Scronce, Gabrielle <scronce@musc.edu>; Howard, Keith <howardke@musc.edu>; Blaschke, Jenna <blaschkj@musc.edu>

**Subject:** Re: Your signature needed

This email is regarding the VA trial protocol manuscript that was submitted to the journal, Trials.

Dr. Craig Velozo is a member of the Data and Safety Monitoring Board and has substantially contributed to the trial design and monitoring. He was not included as an author in the original submission because he did not have time to review/approve the manuscript at the time of submission. Since then, he has reviewed the manuscript, provided substantial feedback, approved the manuscript, and agreed to be an author.

Could you please reply to me and **indicate if you approve** adding Dr. Velozo to the author list for the paper?

You can do that in lieu of signing on the Author Form.

Thank you!

Na Jin

**Subject:** Re: Your approval needed

**Date:** Wednesday, February 16, 2022 at 9:44:22 PM Eastern Standard Time

**From:** Blaschke, Jenna

**To:** Seo, Na Jin

Hi Dr. Seo,

I approve adding Dr. Velozo to the author list for the VA trial protocol paper.

All the best,  
Jenna

Get [Outlook for Android](#)

---

**From:** Seo, Na Jin <seon@musc.edu>

**Sent:** Wednesday, February 16, 2022 9:39:56 PM

**To:** Blaschke, Jenna <blaschkj@musc.edu>

**Subject:** Your approval needed

Hi Jenna,

This email is regarding the VA trial protocol manuscript that was submitted to the journal, Trials.

Dr. Craig Velozo is a member of the Data and Safety Monitoring Board and has substantially contributed to the trial design and monitoring. He was not included as an author in the original submission because he did not have time to review/approve the manuscript at the time of submission. Since then, he has reviewed the manuscript, provided substantial feedback, approved the manuscript, and agreed to be an author.

Could you please reply to me and **indicate if you approve** adding Dr. Velozo to the author list for the paper?

Thank you!  
Na Jin

**Subject:** Re: Your approval needed

**Date:** Wednesday, February 16, 2022 at 1:53:53 PM Eastern Standard Time

**From:** Meinzer, Caitlyn

**To:** Seo, Na Jin

I approve, thanks

Get [Outlook for Android](#)

---

**From:** Seo, Na Jin <seon@musc.edu>

**Sent:** Wednesday, February 16, 2022 1:35:39 PM

**To:** Meinzer, Caitlyn <ellerbcn@musc.edu>

**Subject:** Your approval needed

Hi Caitlyn,

This email is regarding the VA trial protocol manuscript that was submitted to the journal, Trials.

Dr. Craig Velozo is a member of the Data and Safety Monitoring Board and has substantially contributed to the trial design and monitoring. He was not included as an author in the original submission because he did not have time to review/approve the manuscript at the time of submission. Since then, he has reviewed the manuscript, provided substantial feedback, approved the manuscript, and agreed to be an author.

Could you please **indicate if you approve** adding Dr. Velozo to the author list for the paper?

Thank you!

Na Jin

**Subject:** RE: Your approval needed

**Date:** Wednesday, February 16, 2022 at 2:16:15 PM Eastern Standard Time

**From:** Adams, Robert J.

**To:** Seo, Na Jin

yes if he meets criteria of course he should be added. Robert

Robert J Adams MS MD  
Distinguished Professor of Neurology  
Director South Carolina Stroke Center of Economic Excellence  
Department of Neurology  
Medical University South Carolina  
Charleston, SC 29425  
President Zeriscope, Inc

---

**From:** Seo, Na Jin <seon@musc.edu>

**Sent:** Wednesday, February 16, 2022 1:35 PM

**To:** Adams, Robert J. <adamsrj@musc.edu>

**Subject:** Your approval needed

Hi Dr. Adams,

This email is regarding the VA trial protocol manuscript that was submitted to the journal, Trials.

Dr. Craig Velozo is a member of the Data and Safety Monitoring Board and has substantially contributed to the trial design and monitoring. He was not included as an author in the original submission because he did not have time to review/approve the manuscript at the time of submission. Since then, he has reviewed the manuscript, provided substantial feedback, approved the manuscript, and agreed to be an author.

Could you please **indicate if you approve** adding Dr. Velozo to the author list for the paper?

Thank you!

Na Jin
